# Supplementary material
Source: HighWire-hosted journal article supplement (https://bmjopen.bmj.com/content/15/2/e093894)
Supplement: inline-supplementary-material-1 [file inline-supplementary-material-1.pdf]

## **Appendix A**

### **Adolescent Advisory Group Training Activities**

(Subject to change based on AAG member's needs)

#### **Information about training:**

The training for the adolescent advisory group (AAG) includes a mix of group training sessions and individual study/practice. There will be 14 separate group training sessions. Training sessions range in length from 1.5- 2 hours and will all take place in person. The training sessions will be led by NPA, PA, youth/graduate research assistants, and trainees. The training sessions will include group discussions and opportunities to inform the actual study. While the facilitators will be there to provide AAG with important information, there will also be an opportunity for all to learn together and to improve the study as a team. AAG group members will be encouraged to ask questions, provide feedback and comments, and join in the discussions. At the end of this training, if AAG members feel that there are things we have missed or there are some topics they would like more information on, there will be an opportunity for them to inform the facilitators and we will explore different options for addressing those needs.

### **Training Schedule**

#### **Training Session 1: Introduction**

Date/Time: TBD

Topics Covered:

- Welcome to training session #1 – Introduction
- The AAG position (roles and responsibilities).
- Training structure and ground rules
- Participant privacy and confidentiality forms.

#### **Training Sessions 2 -7: Adolescent sexual and reproductive health\***

Date/Time: TBD

Topics Covered:

- Ice breaker.
- What are Human Rights?
- What is sexual and reproductive health and rights (SRHR) and why knowledge about SRHR is important for adolescents? What are the challenges adolescents face related to SRHR? (topics covered under this module will be):
  - What is the difference between gender and sex?
  - Knowing about changes during puberty?
  - Early marriage and consequences of early marriages
  - Gender-based violence
  - How the project will help to understand the adolescent's SRHR information needs?
  - Any other topic identified by AAG

#### **Training Session 8: Share the PA qualitative research findings**

Date/Time: TBD

Topics Covered:

- Ice breaker

- Share the qualitative research findings
- Open discussion: how to use these findings in developing a priority list of SHRH concerns and the development of Toolkit prototype
- Debrief

**Training Sessions 9-11: Identification and prioritization of SRHR concerns**

Date/Time: TBD

Topics Covered:

- Ice breaker
- Participants will be actively engaged in developing a priority list of SHRH concerns
- Open discussion/personal story
- Debrief - Group discussion

**Training Session 12-17: Design Thinking workshops/Co-design the Toolkit**

Date/Time: TBD

Topics Covered:

- Ice breaker
- Participants will be actively engaged in Toolkit development
- Open discussion and feedback on the prototype
- Debrief - Group discussion

**Training Sessions 18-20: Share the refined Toolkit prototype**

Date/Time: TBD

Topics Covered:

- Ice breaker
- Share the revised Toolkit prototype with AAG participants
- Open discussion and feedback on the prototype
- Debrief - Group discussion

## Appendix B: DEPICT steps, roles, and guiding questions

| DEPICT step                                       | Coordination functions                                                                                                                                                                                                                               | Team member roles                                                                                                                                                                                                                                                   | Questions to ask                                                                                                                                                                                                                                                                                  |
|---------------------------------------------------|------------------------------------------------------------------------------------------------------------------------------------------------------------------------------------------------------------------------------------------------------|---------------------------------------------------------------------------------------------------------------------------------------------------------------------------------------------------------------------------------------------------------------------|---------------------------------------------------------------------------------------------------------------------------------------------------------------------------------------------------------------------------------------------------------------------------------------------------|
| Dynamic reading                                   | Collate, assign and distribute a subset of transcripts to each team member. Set deadlines and meeting times.                                                                                                                                         | Review a subset of assigned transcripts—record notes on important concepts.                                                                                                                                                                                         | What ideas seem to be important in these texts? (inductive)                                                                                                                                                                                                                                       |
| Engaged codebook development                      | Assemble supplies (e.g., post-it notes, pens) and arrange for team meetings. Ensure skilled meeting facilitation. Ensure that a preliminary codebook is developed. Coordinate pilot testing and refining of the codebook.                            | List important ideas for categorizing data. As a group, organize categories into clusters. Come to a consensus around a preliminary codebook. Participate in pilot testing.                                                                                         | What is our agreed-upon list of categories and sub-categories we will use for our codebook? Do we have the right categories? Do we all understand what they mean and how to apply them? Do any require further refinement?                                                                        |
| Participatory coding                              | Assign and distribute a subset of transcripts for coding to each team member—set deadlines and meeting times. Provide training and support for novices. Coordinate a strategy for managing the data.                                                 | Review and code each assigned transcript. Return coding work to the coordinator (in paper or electronic form).                                                                                                                                                      | Which sections of the transcript fit into which categories of our codebook?                                                                                                                                                                                                                       |
| Inclusive reviewing and summarizing of categories | Generate a list of quotes associated with each category. Assign team members a sub-set of categories to summarize. Distribute guiding worksheets for summarizing categories.                                                                         | Work alone or in pairs to develop category summaries. Return work to the coordinator.                                                                                                                                                                               | What are the main ideas? Where is there disagreement? What are some key quotes? Are there silences worth noting? What else is important to note that might help in the analysis of the larger project?                                                                                            |
| Collaborative analyzing                           | Arrange for one or more team meetings. Ensure skilled meeting facilitation. Select a note-taker in advance. Prior to the meeting, disseminate summaries for review. Ensure that consensus is reached and recorded on new understandings of the data. | Review summaries prior to the meeting. Participate in a collaborative meeting to make sense of data. Graphically depict or create a figure that illustrates findings. Come to a consensus on new understandings emerging from the data and what needs to be shared. | What does it all mean? What were our most important findings? What do we need to share, and with whom? What questions do we still have? For critical analyses, what structural factors may help us understand why people chose to tell us their shared stories (e.g., homophobia, neoliberalism). |
| Translating                                       | Arrange for team meeting(s). Ensure skilled meeting facilitation. Circulate meeting report with clear action items.                                                                                                                                  | Develop a knowledge translation and exchange plan to share research results with relevant stakeholders. Create a plan for equitably distributing this work.                                                                                                         | Who needs to know what? How do they need to hear it? Who are the best messengers? How do we get the word out? Who on our team will be responsible for what and by when?                                                                                                                           |
